# Supplementary material for: Buckled AgNW/MXene hybrid hierarchical sponges for high-performance electromagnetic interference shielding
Source: Royal Society of Chemistry journal article supplement (doi:10.1039/c9nr07988b), 2019-01-01
Supplement: c9nr07988b1.pdf [file c9nr07988b1.pdf]

## Supporting Information

### **Buckled AgNW/Mxene Hybrid Hierarchical Sponges for High-Performance Electromagnetic Interference Shielding**

Chuanxin Weng,<sup>1,2</sup> Guorui Wang,<sup>1</sup> Zhaohe Dai,<sup>3</sup> Yongmao Pei,<sup>4</sup> Luqi Liu<sup>\*1</sup> and Zhong  
Zhang<sup>\*1</sup>

<sup>1</sup> CAS Key Laboratory of Nanosystem and Hierarchical Fabrication and CAS Center for Excellence in Nanoscience, National Center for Nanoscience and Technology, Beijing 100190, China

<sup>2</sup> University of Chinese Academy of Sciences, Beijing 100049, China

<sup>3</sup> Center for Mechanics of Solids, Structures and Materials, Department of Aerospace Engineering and Engineering Mechanics, The University of Texas at Austin, Austin, TX 78712, USA

<sup>4</sup> State Key Laboratory for Turbulence and Complex Systems, College of Engineering, Peking University, Beijing 100871, China.

\*Email: liulq@nanoctr.cn; zhong.zhang@nanoctr.cn

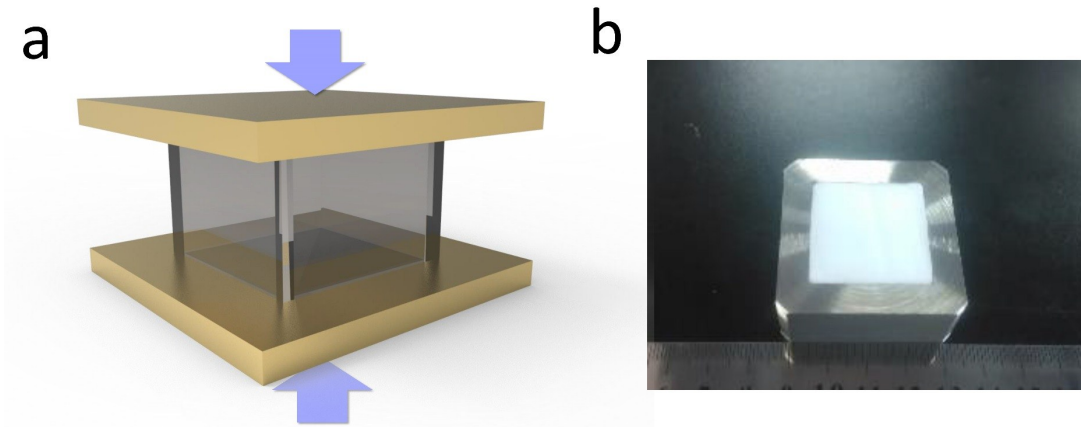

Figure S1. (a) The schematic of hot-pressing process. (b) The digital photo of sample after hot-pressing.

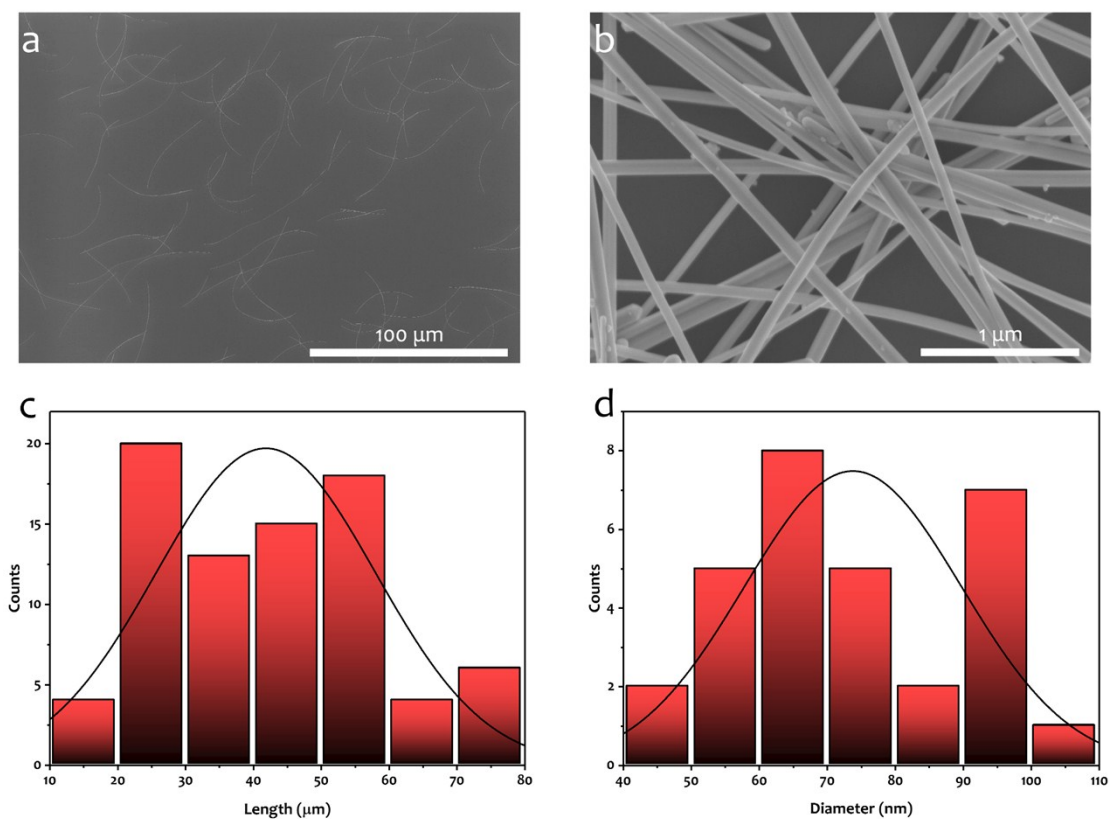

Figure S2. (a) and (b) SEM pictures for AgNW. The distribution of AgNW for (c) length and (d) diameter. The typical length of AgNW is about  $41.8 \pm 16.2 \mu\text{m}$ , and the diameter is around  $73.8 \pm 16.0 \text{ nm}$ .

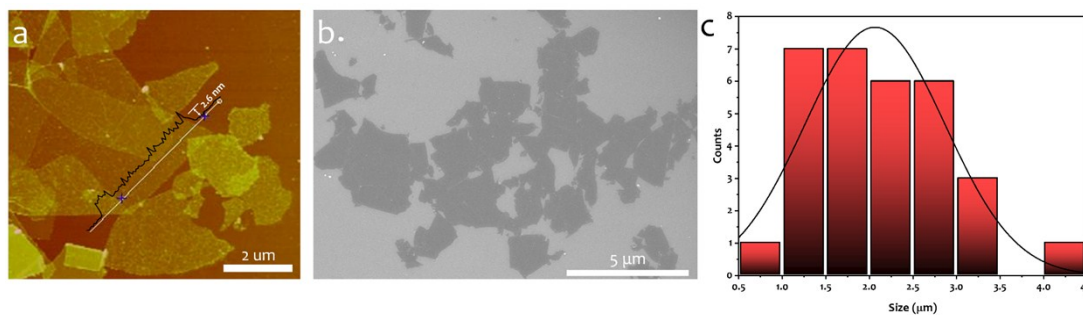

Figure S3. (a) AFM image of the MXene sheets. (b) SEM image of MXene sheets. (c) distribution for lateral size of MXene sheets. The thickness of MXene sheet is about 2.6 nm, and the lateral size is about  $2.1 \pm 0.8 \mu\text{m}$ .

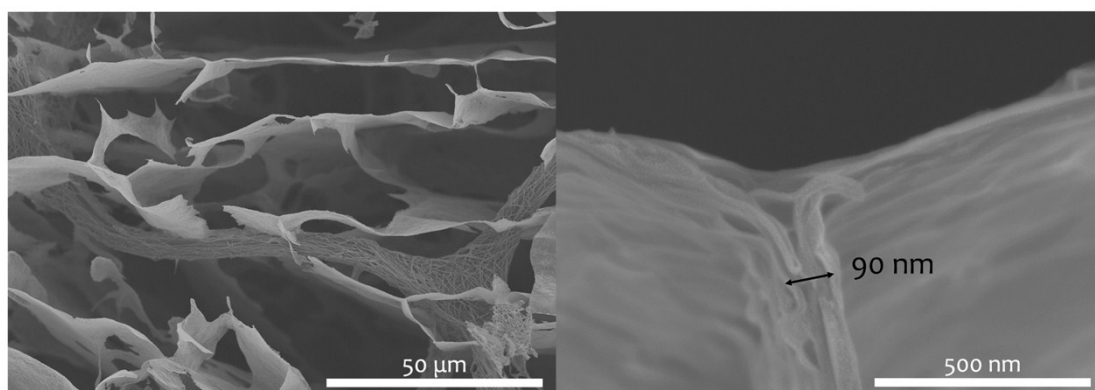

Figure S4. SEM images of BMF/AgNW/MXene sponge (left) and the magnified cell wall (right).

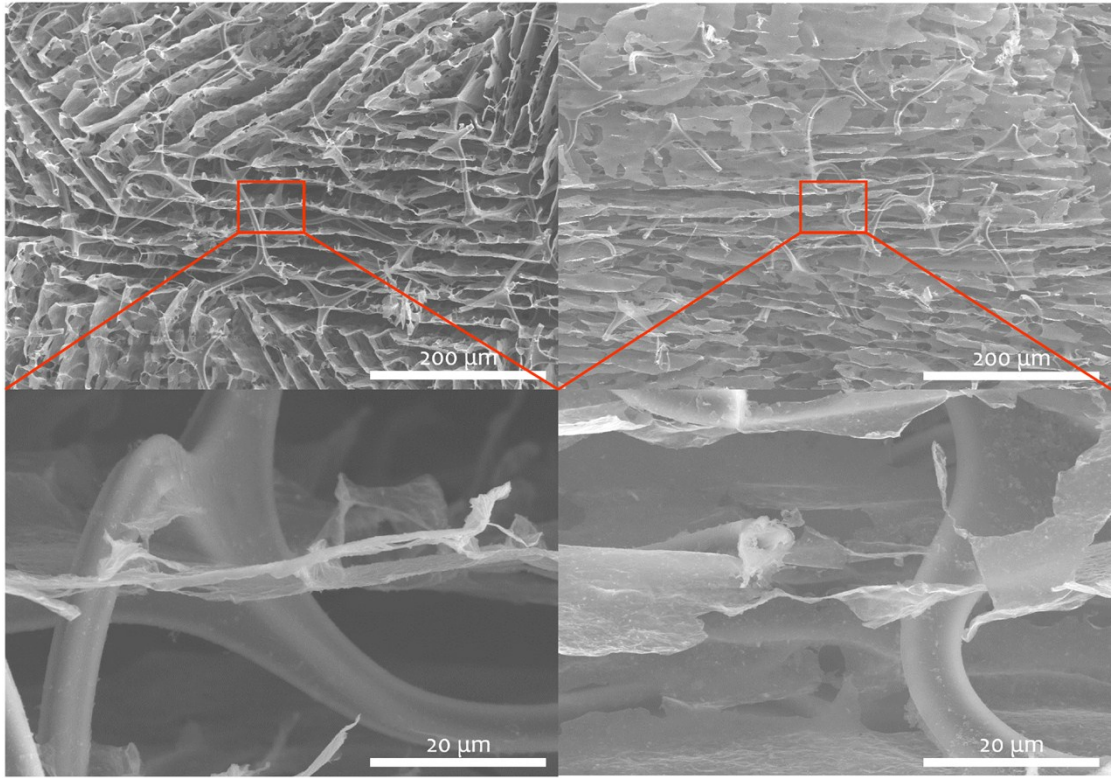

Figure S5. SEM views of the BMF/MXene foam along the out-of-plane direction (left) and in-plane direction (right).

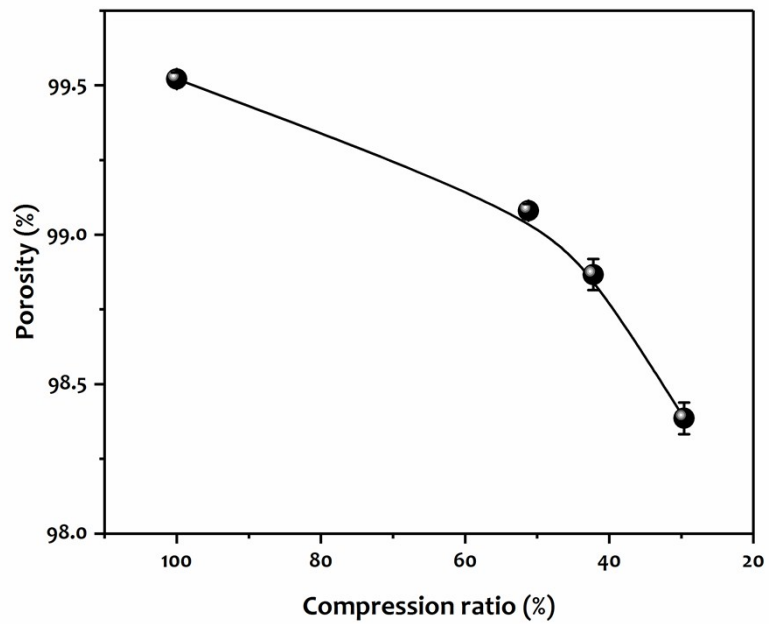

Figure S6. The porosity of BMF sponges with different compression ratios [the porosity is calculated based on the density of the sponge, and the equation can be described as:

$p = (1 - \frac{\rho_0}{\rho}) * 100\%$ . Here, the  $P$  is the porosity,  $\rho_0$  is the density of the sponge,  $\rho$  is the density of the melamine resin (1.57 g/cm<sup>3</sup>)]<sup>1</sup>.

Table S1. EMI shielding performance of various aerogel/foam/sponge materials (G: graphene; CNT: carbon nanotube; SF: silver plating foam; EP: epoxy; PS: polystyrene; PVDF: polyvinylidene fluoride; PI: polyimide; WPU: water polyurethane; PEI: polyetherimide; PMMA: polymethyl methacrylate).<sup>2-24</sup>

| Methods                                | Materials                                   | Density (mg/cm <sup>3</sup> ) | Thickness (cm) | EMI SE (dB) | EMI SE/t (dB/mm) | SSE (dB·cm <sup>3</sup> ·g <sup>-1</sup> ) | SSE/t (dB·cm <sup>2</sup> ·g <sup>-1</sup> ) | Reference |
|----------------------------------------|---------------------------------------------|-------------------------------|----------------|-------------|------------------|--------------------------------------------|----------------------------------------------|-----------|
| Foaming & Phase separating             | SWCNT/PS                                    | 560                           | 0.12           | 18.5        | 15.4             | 33                                         | 275                                          | 2         |
|                                        | MWCNTs-Fe <sub>3</sub> O <sub>4</sub> /PMMA | 262                           | 0.25           | 13.1        | 5.24             | 50                                         | 200                                          | 3         |
|                                        | PS/G                                        | 270                           | 0.25           | 17.3        | 6.9              | 64                                         | 256                                          | 4         |
|                                        |                                             | 450                           | 0.25           | 29.3        | 11.7             | 65                                         | 256                                          |           |
|                                        | PEI/G                                       | 290                           | 0.23           | 20          | 8.7              | 69                                         | 68                                           | 5         |
|                                        | G-Fe <sub>3</sub> O <sub>4</sub> /PEI       | 400                           | 0.25           | 19          | 7.6              | 47.5                                       | 190                                          | 6         |
|                                        | PI/G                                        | 280                           | 0.08           | 17          | 21.25            | 61                                         | 759                                          | 7         |
|                                        |                                             | 280                           | 0.08           | 21          | 26.25            | 75                                         | 937                                          |           |
|                                        | MWCNT/PVDF                                  | 790                           | 0.2            | 56.7        | 28.35            | 72                                         | 360                                          | 8         |
|                                        | SF-EP-CNT                                   | 609.9                         | 0.2            | 68.1        | 34.05            | 111.66                                     | 558.3                                        | 9         |
| Carbonizing & CVD                      | Carbon foam                                 | 220                           | 0.5            | 17.2        | 3.44             | 78                                         | 156                                          | 10        |
|                                        |                                             | 220                           | 0.4            | 16.3        | 4                | 74                                         | 185                                          |           |
|                                        |                                             | 220                           | 0.3            | 15.7        | 5.23             | 71                                         | 236.7                                        |           |
|                                        | C/AgNWs                                     | 130                           | 0.45           | 60          | 13.3             | 461                                        | 1023                                         | 11        |
|                                        | Graphite/PDMS                               | 170                           | 0.45           | 31.1        | 6.9              | 183                                        | 406.6                                        | 12        |
|                                        |                                             | 190                           | 0.45           | 33.7        | 7.8              | 177.4                                      | 394                                          |           |
|                                        |                                             | 220                           | 0.45           | 35.8        | 7.9              | 162.7                                      | 361                                          |           |
|                                        | PDMS/G                                      | 60                            | 0.1            | 20          | 20               | 333                                        | 3333                                         | 13        |
|                                        | G/PDMS                                      | 90                            | 0.2            | 25          | 12.5             | 278                                        | 1390                                         | 14        |
|                                        | Carbon NWs/G/PDMS                           | 97.1                          | 0.16           | 36          | 22.5             | 371                                        | 2318.75                                      | 15        |
|                                        | G/PDMS                                      | 64.1                          | 0.16           | 21          | 13.12            | 328                                        | 2050                                         |           |
|                                        | Ag@C                                        | 3.82                          | 0.2            | 51.2        | 25.6             | 13403                                      | 67015                                        | 16        |
|                                        |                                             | 3.82                          | 0.3            | 70.1        | 23.4             | 18350.7                                    | 61169                                        |           |
| C-CNT/CNF                              | 14                                          | 0.5                           | 21             | 4.2         | 1690             | 3370                                       | 17                                           |           |
| Carbon foam                            | 6                                           | 0.1                           | 23             | 23          | 3800             | 38000                                      | 18                                           |           |
| Template (freeze-drying & dip-coating) | MWCNT/WPU                                   | 126                           | 0.23           | 50          | 21.7             | 397                                        | 1726                                         | 19        |
|                                        | Carbon/Graphene                             | 61                            | 0.5            | 43          | 8.6              | 705                                        | 1410                                         | 20        |
|                                        |                                             | 61                            | 0.3            | 27          | 9                | 443                                        | 1476.7                                       |           |
|                                        |                                             | 61                            | 0.2            | 21          | 10.5             | 344                                        | 1720                                         |           |
|                                        | CNT-interface/cellulose                     | 77                            | 0.25           | 40          | 16               | 519                                        | 2076                                         | 21        |
|                                        | CNT-matrix/cellulose                        | 47                            | 0.25           | 20          | 8                | 425                                        | 1700                                         |           |
|                                        |                                             | 51                            | 0.25           | 27          | 10.8             | 529                                        | 2116                                         |           |
|                                        |                                             | 43                            | 0.25           | 30          | 12               | 698                                        | 2792                                         |           |
|                                        |                                             | 36                            | 0.25           | 35          | 14               | 972                                        | 3888                                         |           |
|                                        | Melamine sponge/G                           | 19                            | 1.2            | 24          | 2                | 1263                                       | 1052                                         | 22        |
|                                        | PU/G                                        | 27                            | 2              | 12.4        | 0.6              | 459                                        | 210                                          | 23        |
|                                        |                                             | 27                            | 6              | 34.7        | 0.6              | 1285                                       | 210                                          |           |
|                                        |                                             | 30                            | 2              | 19.9        | 1                | 663                                        | 320                                          |           |
|                                        |                                             | 30                            | 6              | 57.7        | 1                | 1923                                       | 320                                          |           |
|                                        | Melamine sponge/G                           | 11                            | 4              | 37.2        | 0.93             | 3410                                       | 852.5                                        | 24        |
|                                        | BMF/AgNW                                    | 43                            | 0.2            | 40          | 20               | 930                                        | 4650                                         | This work |
|                                        |                                             | 41                            | 0.2            | 32.8        | 16.4             | 800                                        | 4000                                         |           |
|                                        |                                             | 31                            | 0.2            | 28          | 14               | 903                                        | 4515                                         |           |
|                                        | 19                                          | 0.2                           | 21             | 10.5        | 1105             | 5525                                       |                                              |           |
| BMF/AgNW/MXene                         | 49.5                                        | 0.2                           | 52.6           | 26.3        | 1062             | 5313                                       |                                              |           |

## Reference:

1. V. H. Pham and J. H. Dickerson, *ACS Appl. Mater. Interfaces*, 2014, **6**, 14181-14188.
2. Y. Yang, M. C. Gupta, K. L. Dudley and R. W. Lawrence, *Nano Lett.*, 2005, **5**, 2131-2134.
3. H. Zhang, G. Zhang, J. Li, X. Fan, Z. Jing, J. Li and X. Shi, *Composites, Part A*, 2017, **100**, 128-138.
4. D.-X. Yan, P.-G. Ren, H. Pang, Q. Fu, M.-B. Yang and Z.-M. Li, *J. Mater. Chem.*, 2012, **22**, 18772-18774.
5. J. Ling, W. Zhai, W. Feng, B. Shen, J. Zhang and W. Zheng, *ACS Appl. Mater. Interfaces*, 2013, **5**, 2677-2684.
6. B. Shen, W. Zhai, M. Tao, J. Ling and W. Zheng, *ACS Appl. Mater. Interfaces*, 2013, **5**, 11383-11391.
7. Y. Li, X. L. Pei, B. Shen, W. T. Zhai, L. H. Zhang and W. G. Zheng, *RSC Adv.*, 2015, **5**, 24342-24351.
8. H. Wang, K. Zheng, X. Zhang, X. Ding, Z. X. Zhang, C. Bao, L. Guo, L. Chen and X. Y. Tian, *Compos. Sci. Technol.*, 2016, **125**, 22-29.
9. Y. Xu, Y. Li, W. Hua, A. Zhang and J. Bao, *ACS Appl. Mater. Interfaces*, 2016, **8**, 24131-24142.
10. Y. Yuan, Y. Ding, C. Wang, F. Xu, Z. Lin, Y. Qin, Y. Li, M. Yang, X. He, Q. Peng and Y. Li, *ACS Appl. Mater. Interfaces*, 2016, **8**, 16852-16861.
11. Y. Yuan, X. Sun, M. Yang, F. Xu, Z. Lin, X. Zhao, Y. Ding, J. Li, W. Yin, Q. Peng, X. He and Y. Li, *ACS Appl. Mater. Interfaces*, 2017, **9**, 21371-21381.
12. H. Li, L. Jing, Z. L. Ngoh, R. Y. Tay, J. Lin, H. Wang, S. H. Tsang and E. H. T. Teo, *ACS Appl. Mater. Interfaces*, 2018, **10**, 41707-41716.
13. Z. Chen, C. Xu, C. Ma, W. Ren and H. M. Cheng, *Adv. Mater.*, 2013, **25**, 1296-1300.
14. X. Y. Sun, X. Liu, X. Shen, Y. Wu, Z. Y. Wang and J. K. Kim, *Composites, Part A*, 2016, **85**, 199-206.
15. L. Kong, X. W. Yin, M. K. Han, X. Y. Yuan, Z. X. Hou, F. Ye, L. T. Zhang, L. F. Cheng, Z. W. Xu and J. F. Huang, *Carbon*, 2017, **111**, 94-102.
16. Y. J. Wan, P. L. Zhu, S. H. Yu, R. Sun, C. P. Wong and W. H. Liao, *Small*, 2018, **14**, 1800534.
17. O. Pitkanen, J. Tolvanen, I. Szenti, A. Kukovecz, J. Hannu, H. Jantunen and K. Kordas, *ACS Appl. Mater. Interfaces*, 2019, **11**, 19331-19338.
18. Y. Tang, D. Li, D. Ao, S. Li and X. Zu, *J. Mater. Sci.: Mater. Electron.*, 2018, **29**, 13643-13652.
19. Z. H. Zeng, H. Jin, M. J. Chen, W. W. Li, L. C. Zhou and Z. Zhang, *Adv. Funct. Mater.*, 2016, **26**, 303-310.
20. Y. Yuan, L. Y. Liu, M. L. Yang, T. L. Zhang, F. Xu, Z. S. Lin, Y. J. Ding, C. H. Wang, J. J. Li, W. L. Yin, Q. Y. Peng, X. D. He and Y. B. Li, *Carbon*, 2017, **123**, 223-232.

21. L. Q. Zhang, S. G. Yang, L. Li, B. Yang, H. D. Huang, D. X. Yan, G. J. Zhong, L. Xu and Z. M. Li, *ACS Appl. Mater. Interfaces*, 2018, **10**, 40156-40167.
22. C. Liu, S. Ye and J. Feng, *Chem. Asian J.*, 2016, **11**, 2586-2593.
23. B. Shen, Y. Li, W. Zhai and W. Zheng, *ACS Appl. Mater. Interfaces*, 2016, **8**, 8050-8057.
24. T. Guo, X. Chen, L. Su, C. Li, X. Huang and X.-Z. Tang, *Materials & Design*, 2019, **182**, 108029.
